# Supplementary material for: Exosomal miR-6126 as a novel therapeutic target for overcoming resistance of anti-cancer effect in hepatocellular carcinoma
Source: Springer Nature journal article supplement (doi:10.1186/s12885-024-13342-y), 2024-12-20
Supplement: MOESM2 [file 12885_2024_13342_MOESM2_ESM.pdf]

## **Additional File 2**

### **Exosomal miR-6126 as a novel therapeutic target for overcoming resistance of anti-cancer effect in hepatocellular carcinoma**

Hyemin Hwang<sup>1,#</sup>, Jimin Kim<sup>1,#</sup>, Tae-Hun Kim<sup>2</sup>, Yeonju Han<sup>1</sup>, Dayoung Choi<sup>1</sup>, Sua Cho<sup>1</sup>, Seunghwan Kim<sup>1</sup>, Sanghee Park<sup>1</sup>, Taehyun Park<sup>1</sup>, Filippo Piccinini<sup>3,4</sup>, Won Jong Rhee<sup>5</sup>, Jae-Chul Pyun<sup>2</sup>, Misu Lee<sup>1,6,\*</sup>

<sup>1</sup>Division of Life Sciences, College of Life Science and Bioengineering, Incheon National University, Incheon, 22012, Republic of Korea

<sup>2</sup>Department of Materials Science and Engineering, Yonsei University, 50 Yonsei-Ro, Seodaemun-Gu, Seoul, 03722, Republic of Korea.

<sup>3</sup>IRCCS Istituto Romagnolo per lo Studio dei Tumori (IRST) “Dino Amadori”, Meldola, Italy

<sup>4</sup>Department of Medical and Surgical Sciences (DIMEC), University of Bologna, Bologna, Italy

<sup>5</sup>Department of Bioengineering and Nano-Bioengineering, Incheon National University Incheon 22012, Republic of Korea.

<sup>6</sup>Institute for New Drug Development, College of Life Science and Bioengineering, Incheon National University, Incheon, 22012, Republic of Korea

# These authors contributed equally to this study.

Corresponding author: Misu Lee, PhD

Incheon National University, Incheon, Republic of Korea

E-mail: [misulee@inu.ac.kr](mailto:misulee@inu.ac.kr); Tel.: +82 32 835 8091; Fax: + 82 32 835 0754

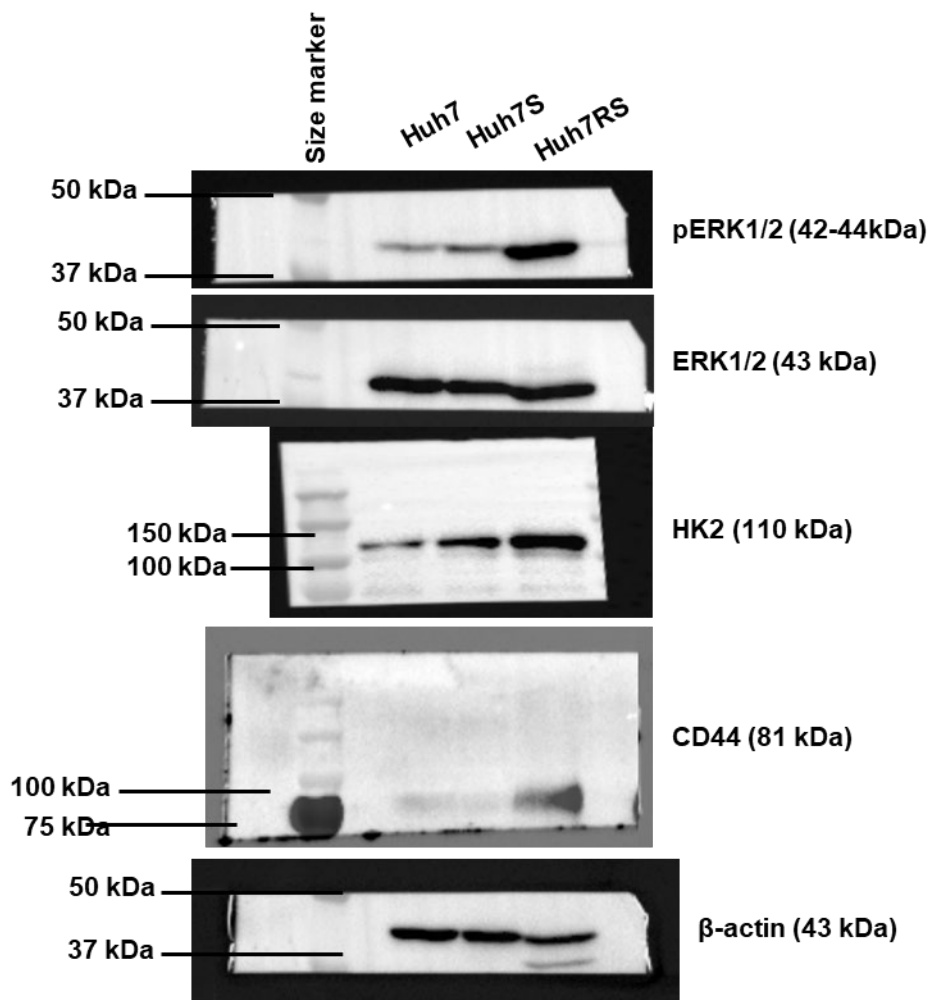

Figure S1. Whole blot images of Fig 1B. The pERK, ERK, and  $\beta$ -actin images are from the same blot, while CD44 images are from the upper blot of the pERK.

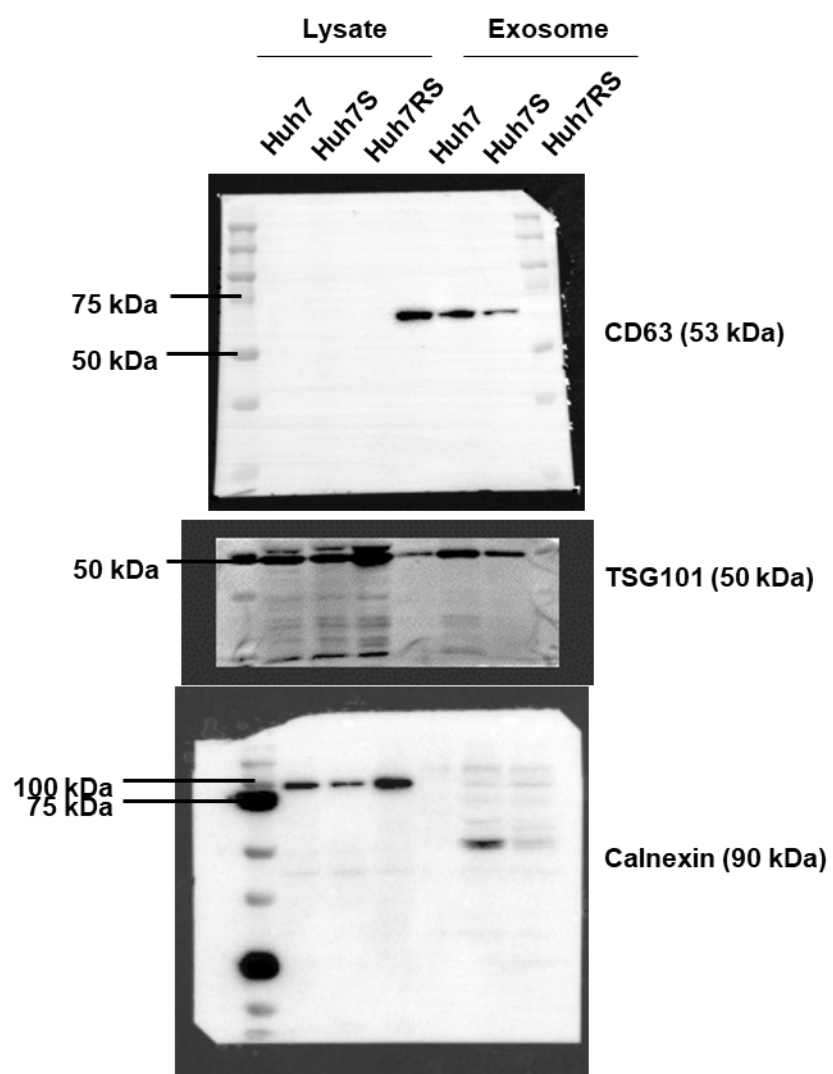

Figure S2. Whole blot images of Fig 1D.

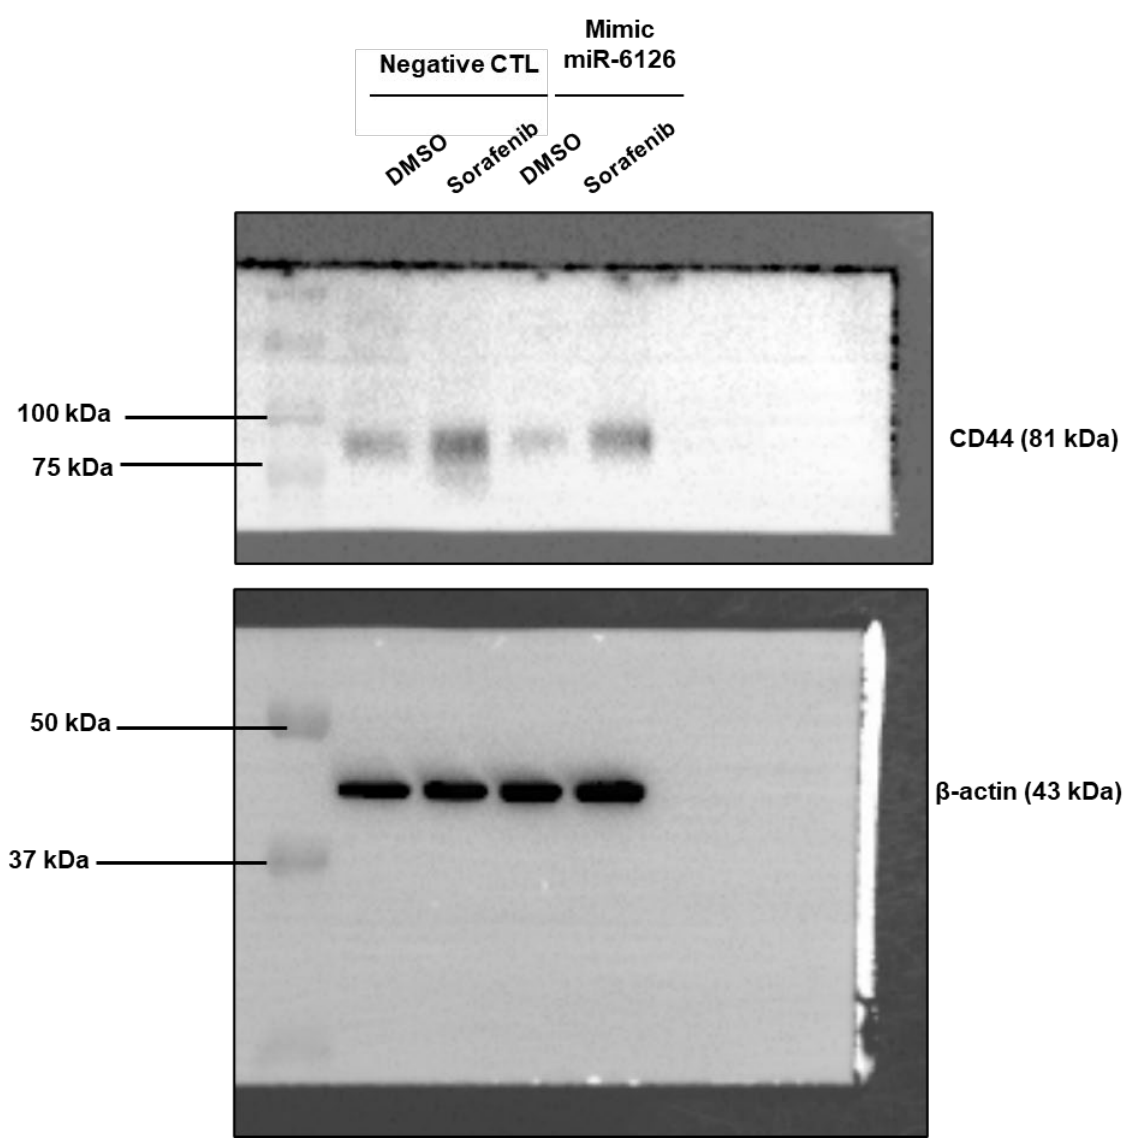

Figure S3. Whole blot images of Fig 4D.

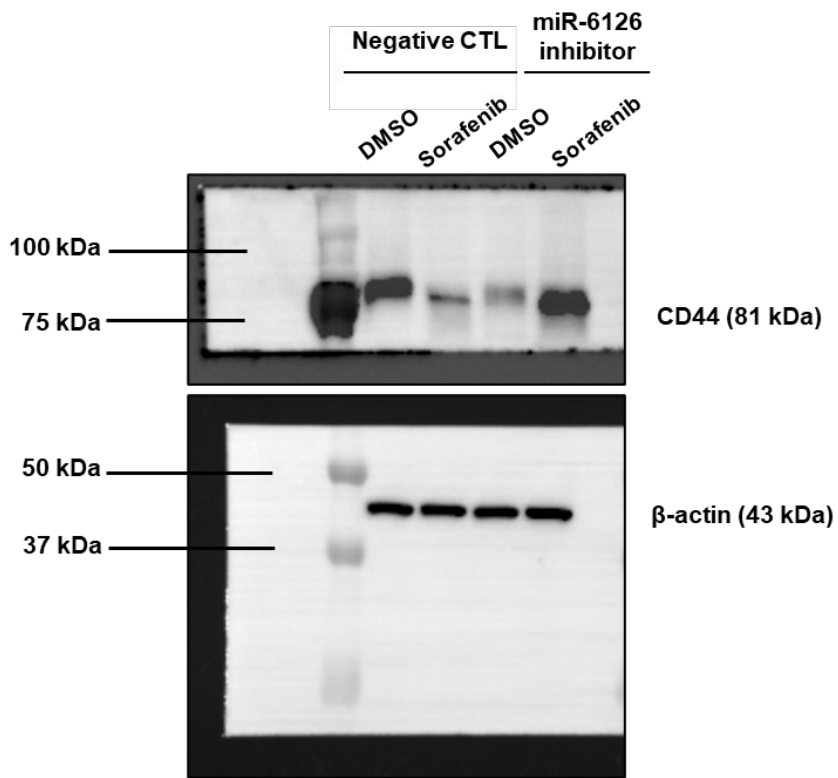

Figure S4. Whole blot images of Fig 5D.

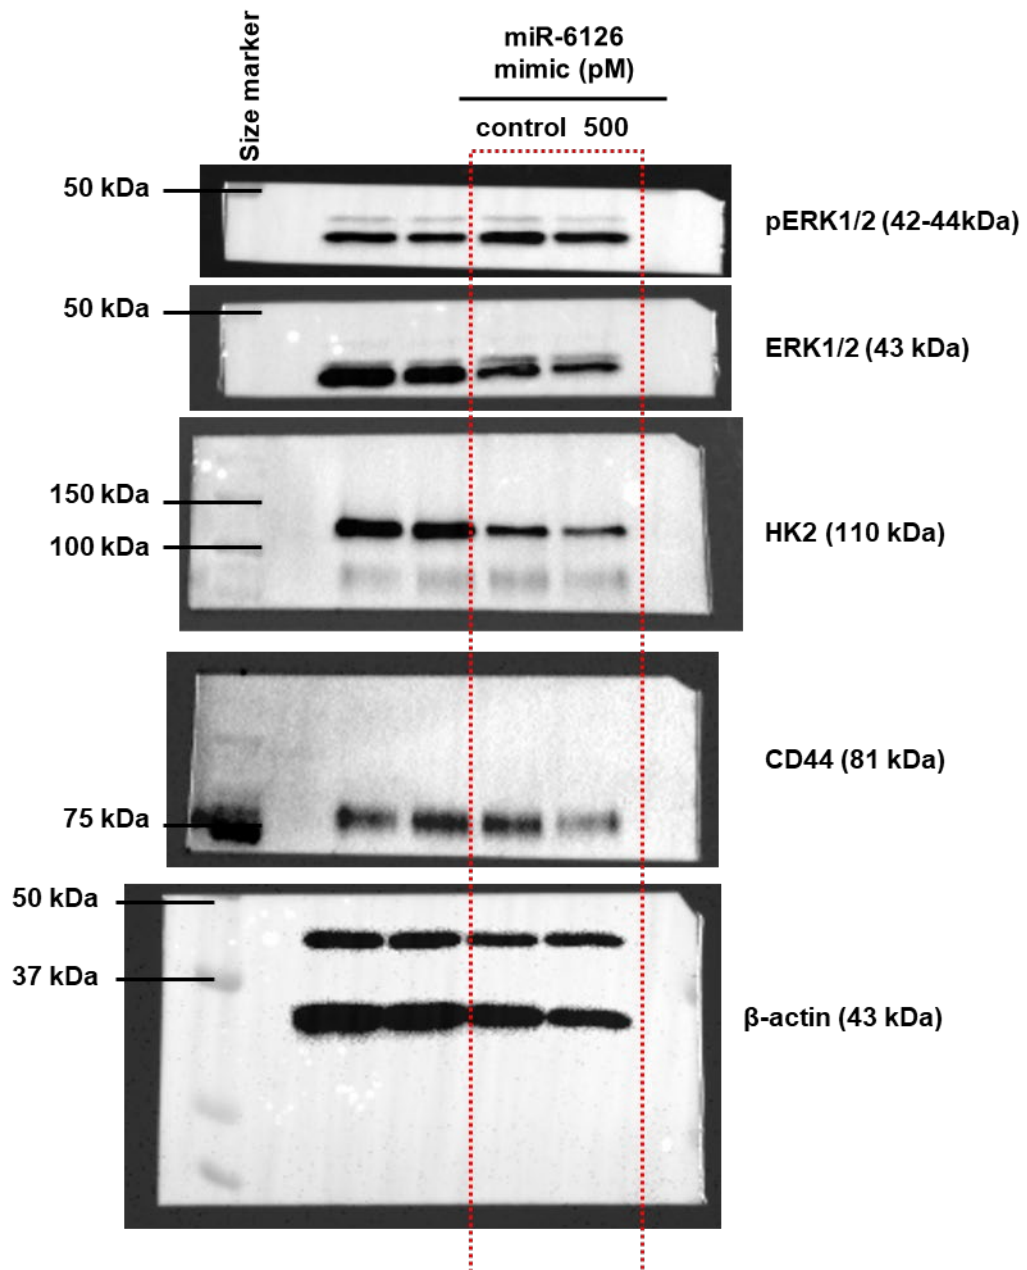

Figure S5. Whole blot images of Fig 6C. The HK2 and CD44 images are from the same blot, while the β-actin images are from an same lower blot of the CD44. The pERK and ERK images are from the same blot.
